# Supplementary material for: The stereochemistry of the stable conformational diastereomers in substituted dihydrodibenzo[ef,kl]heptalenes, the doubly bridged biphenyls. Synthesis, structural elucidation and barrier to conformational diastereomerismElectronic supplementary information (ESI) available: Tables I–III comparing X-ray structural data for 2Aendo–exo, 1Aendo–exo and 1Aexo–exo with AM1 calculations. See http://www.rsc.org/suppdata/p2/b1/b109336n/
Source: Royal Society of Chemistry journal article supplement (doi:10.1039/b109336n), 2002-02-08
Supplement: b109336n.doc [file b109336n.doc]

# Supplementary data

**Table І.** Comparison of X-ray structural data of **2A***endo-exo*with AM1 calculations. Bond lengths in Ångstrom, Bond angles and dihedral angles in degree. For the numbering see Fig. 2.

|  | X-Ray | AM1 |  | X-Ray | *AM1* |
| --- | --- | --- | --- | --- | --- |
|  |  |  |  |  |  |
| Cl1-C11 | 1.735(2) | 1.695 | Cl2-C5 | 1.742(2) | 1.704 |
| C9a-C12c | 1.417(3) | 1.415 | C6a-C12c | 1.424(3) | 1.413 |
| C12b-C12c | 1.496(3) | 1.470 | C12a-C12b | 1.413(3) | 1.414 |
| C3a-C12b | 1.415(3) | 1.409 | C11-C12 | 1.524(3) | 1.508 |
| C12-C12a | 1.511(3) | 1.506 | C9a-C10 | 1.478(3) | 1.458 |
| C10-C11 | 1.323(3) | 1.345 | C5-C6 | 1.313(4) | 1.342 |
| C6-C6a | 1.467(3) | 1.457 | C3a-C4 | 1.507(3) | 1.506 |
| C4-C5 | 1.519(3) | 1.506 | O1-C12 | 1.414(2) | 1.426 |
| O2-C4 | 1.416(3) | 1.430 |  |  |  |
|  |  |  |  |  |  |
| C6a-C12c-C12b | 120.72(19) | 121.1 | C9a-C12c-C12b | 121.41(17) | 121.0 |
| C12a-C12b-C12c | 120.55(17) | 120.4 | C12b-C3a-C4 | 121.1(3) | 123.0 |
| C12-C12a-C12b | 118.38(18) | 119.2 | C3a-C12b-C12c | 122.49(18) | 121.9 |
| O1-C12-C11 | 114.84(17) | 114.2 | O1-C12-C12a | 110.60(17) | 108.9 |
| C10-C11-C12 | 120.15(19) | 118.9 | C11-C12-C12a | 105.62(17) | 106.3 |
| Cl1-C11-C12 | 118.50(15) | 120.2 | C10-C11-Cl1 | 121.21(18) | 120.9 |
| C10-C9a-C12c | 123.73(18) | 123.9 | C9a-C10-C11 | 121.7(2) | 122.5 |
| C6-C6a-C12c | 124.8(2) | 124.1 | C5-C6-C6a | 123.9(2) | 123.7 |
| C4-C5-C6 | 124.2(2) | 123.5 | Cl2-C5-C6 | 121.58(19) | 120.6 |
| Cl2-C5-C4 | 114.20(18) | 115.8 | O2-C4-C3a | 108.96(17) | 108.8 |
| O2-C4-C5 | 113.0(2) | 112.4 | C3a-C4-C5 | 107.60(18) | 107.6 |
|  |  |  |  |  |  |
| H4-C4-C5-C6 | -175.8 | -179.9 | C12b-C3a-C4-C5 | -64.4 | -61.5 |
| H12-C12-C11-C10 | - 48.9 | -49.9 | C12c-C12b-C3a-C4 | -2.2 | -5.6 |
| O2-C4-C5-Cl2 | 121.8 | 123.4 | C12b-C12c-C9a-C10 | -1.5 | -2.2 |
| O1-C12-C11-Cl1 | 17 | 11.8 | C12c-C9a-C10-C11 | -46.9 | -48.2 |
| C3a-C12b-C12c-C6a | 46.2 | 47.0 | C9a-C10-C11-C12 | 4.6 | 6.8 |
| C6-C6a-C12c-C12b | -6.5 | -3.6 | C10-C11-C12-C12a | 70.4 | 68 |
| C5-C6-C6a-C12c | -39.9 | -44.3 | C11-C12-C12a-C12b | -71.8 | -71.3 |
| C4-C5-C6-C6a | 4.3 | 6.8 | C12-C12a-C12b-C12c | -1.2 | -2.4 |
| C3a-C4-C5-C6 | 63 | 60.3 | C12a-C12b-C12c-C9a | 46 | 47.2 |
|  |  |  |  |  |  |

**Table ІІ.** Comparison of X-ray structural data of **1A***endo-exo* with AM1 calculations. Bond lengths in Ångstrom, Bond angles and dihedral angles in degree. For the numbering see Fig. 3.

|  | *X-Ray* | *AM1* |  | *X-Ray* | *AM1* |
| --- | --- | --- | --- | --- | --- |
|  |  |  |  |  |  |
| O1-C10 | 1.413(3) | 1.425 | C9a-C10 | 1.515(3) | 1.508 |
| O2-C4 | 1.420(3) | 1.428 | C12-C12a | 1.471(3) | 1.458 |
| C10-C11 | 1.518(3) | 1.509 | C12a-C12b | 1.428(3) | 1.415 |
| C11-C12 | 1.338(3) | 1.345 | C3a-C4 | 1.509(3) | 1.507 |
| C3a-C12b | 1.415(3) | 1.411 | C4-C5 | 1.515(3) | 1.505 |
| C5-C6 | 1.334(4) | 1.342 | C6-C6a | 1.471(3) | 1.456 |
| C12b-C12c | 1.497(3) | 1.470 | C6a-C12c | 1.422(3) | 1.411 |
| Cl2-C5 | 1.742(2) | 1.704 | C9a-C12c | 1.406(3) | 1.413 |
| Cl1-C11 | 1.739(3) |  |  |  |  |
|  |  |  |  |  |  |
| O1-C10-C11 | 114.8(2) | 114.1 | Cl1-C11-C10 | 117.7(2) | 120.2 |
| C9a-C10-C11 | 104.7(2) | 106.2 | C10-C11-C12 | 121.1(2) | 119.0 |
| Cl1-C11-C12 | 120.9(2) | 120.7 | C11-C12-C12a | 122.6(2) | 122.7 |
| C12-C12a-C12b | 124.7(2) | 124.1 | O1-C10-C9a | 110.1(2) | 109.0 |
| O2-C4-C3a | 109.0(2) | 108.6 | C12a-C12b-C12c | 120.8(2) | 121.0 |
| C3a-C4-C5 | 106.7(2) | 107.6 | C4-C3a-C12b | 120.4(2) | 122.9 |
| Cl2-C5-C6 | 120.2(2) | 120.6 | O2-C4-C5 | 112.9(2) | 112.8 |
| C5-C6-C6a | 124.0(2) | 123.7 | Cl2-C5-C4 | 116.0(2) | 115.8 |
| C6-C6a-C12c | 125.2(2) | 124.2 | C4-C5-C6 | 123.8(2) | 123.5 |
| C10-C9a-C12c | 117.8(2) | 119.1 | C6a-C12c-C12b | 121.7(2) | 121.8 |
| C9a-C12c-C12b | 120.9(2) | 120.5 | C3a-C12b-C12c | 121.7(2) | 121.2 |
|  |  |  |  |  |  |
| H10-C10-C11-C12 | -47.4 | -49.7 | C11-C10-C9a-C12c | -76.5 | -72.2 |
| H4-C4-C5-C6 | -176.3 | -179.7 | C10-C9a-C12c-C12b | 6.1 | -1.0 |
| O2-C4-C5-Cl2 | 123.9 | 123.5 | C3a-C12b-C12c-C6a | 44.6 | 46.9 |
| O1-C10-C11-Cl1 | 16.6 | 11.2 | C12c-C12b-C3a-C4 | 6.8 | -3.0 |
| C12a-C12b-C12c-C9a | 46.3 | 47.0 | C12b-C3a-C4-C5 | -71.6 | -63.4 |
| C12c-C12b-C12a-C12 | -10.8 | -4 | C3a-C4-C5-C6 | 63.1 | 60.1 |
| C12b-C12a-C12-C11 | -39.1 | -46.1 | C4-C5-C6-C6a | 4.1 | 7.1 |
| C10-C11-C12-C12a | 4.7 | 6.0 | C5-C6-C6a-C12c | -34.4 | -42.6 |
| C9a-C10-C11-C12 | 68.3 | 68.1 | C6-C6a-C12c-C12b | -13 | -5.8 |
|  |  |  |  |  |  |

**Table ІІІ.** Comparison of X-Ray structural data of **1A***exo-exo* with AM1 calculations. Bond lengths in Ångstrom, Bond angles and dihedral angles in degree. For the numbering see Fig. 4.

|  | *X-ray* | *AM1* |  | *X-ray* | *AM1* |
| --- | --- | --- | --- | --- | --- |
|  |  |  |  |  |  |
| O1-C10 | 1.398(5) | 1.425 | C10-C9a | 1.518(5) | 1.506 |
| O2-C4 | 1.402(6) | 1.425 | C12-C12a | 1.461(7) | 1.457 |
| C10-C11 | 1.524(5) | 1.508 | C12a-C12b | 1.420(5) | 1.412 |
| C11-C12 | 1.322(5) | 1.345 | C3a-C4 | 1.514(5) | 1.506 |
| C3a-C12b | 1.409(6) | 1.413 | C4-C5 | 1.521(4) | 1.508 |
| C5-C6 | 1.316(6) | 1.345 | C6-C6a | 1.469(6) | 1.457 |
| C12b-C12c | 1.493(4) | 1.413 | C6a-C12c | 1.429(5) | 1.412 |
| Cl2-C5 | 1.725(5) | 1.696 | C9a-C12c | 1.424(6) | 1.413 |
| Cl1-C11 | 1.735(5) | 1.694 |  |  |  |
|  |  |  |  |  |  |
| O1-C10-C11 | 114.8(4) | 114.2 | O1-C10-C9a | 110.6(3) | 108.8 |
| C9a-C10-C11 | 106.0(3) | 106.5 | Cl1-C11-C10 | 117.6(3) | 120.1 |
| Cl1-C11-C12 | 120.7(3) | 120.7 | C10-C11-C12 | 121.6(4) | 119.2 |
| C11-C12-C12a | 123.4(3) | 122.8 | C4-C3a-C12b | 119.0(3) | 119.0 |
| C12-C12a-C12b | 124.6(3) | 123.9 | O2-C4-C5 | 110.4(4) | 114.2 |
| O2-C4-C3a | 114.7(3) | 108.8 | C6a-C12c-C12b | 121.7(3) | 121.7 |
| C3a-C4-C5 | 104.9(3) | 106.5 | Cl2-C5-C4 | 117.3(3) | 120.1 |
| Cl2-C5-C6 | 121.6(4) | 120.7 | C4-C5-C6 | 120.9(4) | 119.2 |
| C5-C6-C6a | 124.0(3) | 122.8 | C3a-C12b-C12c | 120.5(3) | 120.4 |
| C6-C6a-C12c | 124.1(3) | 123.9 | C9a-C12c-C12b | 121.0(3) | 120.4 |
| C10-C9a-C12c | 117.7(3) | 119.0 | C12a-C12b-C12c | 121.5(4) | 121.7 |
|  |  |  |  |  |  |
| H10-C10-C11-C12 | -52.5 | -49.1 | C12c-C9a-C10-C11 | -72.6 | -71.5 |
| H4-C4-C5-C6 | -44.7 | -49 | C10-C9a-C12c-C12b | 2.2 | -1.5 |
| O2-C4-C5-Cl2 | 17.7 | 12 | C3a-C12b-C12c-C6a | 45.1 | 47.1 |
| O1-C10-C11-Cl1 | 14.4 | 11.9 | C4-C3a-C12b-C12c | 4.8 | -1.6 |
| C12a-C12b-C12c-C9a | 47.7 | 47.2 | C12b-C3a-C4-C5 | -74.7 | -71.4 |
| C12-C12a-C12b-C12c | -10.4 | -4.2 | C3a-C4-C5-C6 | 69.3 | 68.9 |
| C11-C12-C12a-C12b | -38.3 | -45.2 | C4-C5-C6-C6a | 2.5 | 4.9 |
| C10-C11-C12-C12a | 2.9 | 5.1 | C5-C6-C6a-C12c | -38.9 | -45.4 |
| C9a-C10-C11-C12 | 68.9 | 68.7 | C6-C6a-C12c-C12b | -9.0 | -3.8 |
|  |  |  |  |  |  |
